# Supplementary material
Source: MDPI journal article supplement (https://www.mdpi.com/2076-3417/12/10/4989)
Supplement: s1 [file s1]

Archive with 3 entries (3 files):
- Figure S1.pdf
- Table S1.pdf
- Table S2.pdf
