# Supplementary material
Source: MDPI journal article supplement (https://www.mdpi.com/2076-3417/12/10/4989)
Supplement: s1 [file s1]

**Table S1.** Genotyping Characterization. 16S rDNA sequences of the isolated lactobacilli strains

|          |                                                                                                                                                                                                                                                                                                                                                                                                                                                                                                                                                                                                                                                                                                                                                                                                                                                                                                                                                                                                                                                                                                                                                                                                                                                                                                                                                                                                                                                                                                                                                                                                                                                                                                                                                            |
|----------|------------------------------------------------------------------------------------------------------------------------------------------------------------------------------------------------------------------------------------------------------------------------------------------------------------------------------------------------------------------------------------------------------------------------------------------------------------------------------------------------------------------------------------------------------------------------------------------------------------------------------------------------------------------------------------------------------------------------------------------------------------------------------------------------------------------------------------------------------------------------------------------------------------------------------------------------------------------------------------------------------------------------------------------------------------------------------------------------------------------------------------------------------------------------------------------------------------------------------------------------------------------------------------------------------------------------------------------------------------------------------------------------------------------------------------------------------------------------------------------------------------------------------------------------------------------------------------------------------------------------------------------------------------------------------------------------------------------------------------------------------------|
| <b>1</b> | <p><b><i>Lacticaseibacillus rhamnosus</i> PAR_4</b></p> <p>aacgctggcggcgtgcctaatacatgcaagtcgaacgagttctgattattgaaaggtgcttgcattcttgatt<br/> taatttgaacgagtgccggacgggtgagtaacacgtgggtaacctgcccttaagtgggggataacatttgg<br/> aaacagatgctaataccgcataaatccaagaaccgcatggttcttggctgaaagatggcgtaagctatcgct<br/> tttggatggaccgcggcgtattagctagttggtgaggtaacggctcaccaaggcaatgatacgtagccgaa<br/> ctgagaggttgatcggccacattgggactgagacacggccaaactcctacgggaggcagcagtagggaatc<br/> ttccacaatggacgcaagtctgatggagcaacgcgcgtgagtgaaaggcttccgggtcgtaaaactctg<br/> ttgttgagaagaatggtcggcagagtaactgttgcggcgtgacgggtatccaaccagaaagccacggctaa<br/> ctacgtgccagcagccgcggaatacgtaggtggcaagcgttatccggatttattgggcgtaaaagcagcgc<br/> aggcgggtttttaagctgatgtgaaagccctcggcttaaccgaggaagtgcacggaaactgggaaacttg<br/> agtcagaagaggacagtggaaactccatgttagcgggtgaaatgcgtagatatatggaagaacaccagtggc<br/> gaaggcggctgtctggtctgtaactgacgtgaggctcgaagcatgggtagcgaacaggattagataccct<br/> ggtagtccatgccgtaaaccgatgaatgctaggtgttgagggtttccgccttcagtgcgcagctaaccga<br/> ttaagcattccgcctggggagtagcaccgcaaggttgaaactcaaaggaattgacgggggcccgcacaagcg<br/> gtggagcatgtggtttaattcgaagcaacgcgaagaaccttaccaggtcttgacatctttgatcacctgag<br/> agatcaggtttccccttcgggggcaaaatgacaggtggtgcatggtgtcgtcagctcgtgtcgtgagatgt<br/> tgggttaagtcccgcaacgagcgaacccttatgactagttgccagcatttagttgggcactctagtaagac<br/> tgccggtgacaaaccggaggaaggtggggatgacgtcaaatcatcatgccccttatgacctgggctacacac<br/> gtgtacaatggatggtacaacgagttgcgagaccgcgaggtcaagctaattctttaagccattctcagtt<br/> cggactgtaggctgcaactgcctacacgaagtcggaatcgtagtaatcgcgatcagcacgccggtgga<br/> atacgttccgggccttgtaacaccccccgtcacaccatgagagttgttaacacccgaagccggtggcgta<br/> acccttttagggagcagcgcgtctaaggtgggacaaatgattaggtgaaagtcgtaacaaggtagccgtagg<br/> agaacc</p>        |
| <b>2</b> | <p><b><i>Lactiplantibacillus plantarum</i> PLA2</b></p> <p>attaattgagagtttgatcctggtcaggacgaacgctggcggcgtgcctaatacatgcaagtcgaacgaa<br/> ctctggtattgattggtgcttgcatcatgatttacatttgagtgagtgagggaactggtgagtaacacgtggg<br/> aaacctgccagaagcgggggataacacctggaacagatgctaataccgcataaacttgaccgcatgg<br/> tccgagtttgaaagatggcttcggctatcacttttggatggtcccgcggcgtattagctagatggtgggta<br/> acggctccatggcaatgatacgtagccgacctgagagggtaatcggccacattgggactgagacacggcc<br/> caaactcctacgggaggcagcagtagggaatcttcacaatggacgaaagtctgatggagcaacccgctg<br/> agtgaagaagggttccggtcgtgtaaaactctgtgttaagaagaacatatctgagagtaactgttcaggta<br/> ttgacggtatttaaccagaaagccacggctaactacgtgccagcagccggttaatacgtaggtggcaagcg<br/> ttgtccggatttattggcgtaaaagcgagcgcaggcggtttttaagtctgatgtgaaagccttcggctcaa<br/> ccgaagaagtgcacgaaactgggaaacttgagtgcagaagaggacagtggaaactccatgtgtagcggta<br/> aatgcgtagatatatggaagaacaccagtgccgaaggcggctgtctggtctgtaactgacgtgaggctcga<br/> aagtatgggtagcaaacaggattagataccctggtagtccataaccgtaaacgatgaatgtaagtgttgag<br/> ggtttccgccttcagtgtcagctaaccgattccgcctggggagtagcggccgaaggctgaaa<br/> ctcaaaggaattgacgggggcccgcacaagcggtggagcatgtggtttaattcgaagctacgcgaagaacct<br/> taccaggtcttgacatactatgcaaatctaagagattagacgttccttcggggacatggatacaggtggtg<br/> catggtgtcgtcagctcgtgtcgtgagatgttgggttaagtcccgaacgagcgcaacccttattatcagt<br/> tgccagcattaagtgggcactctggtgagactgccggtgacaaaccggaggaaggtggggatgacgtcaaa<br/> tcacatgccccttatgacctgggtacacacgtgctacaatggatggtacaacgagttgcgaactcgcgag<br/> agtaagctaattctttaagccattctcagttcggattgtaggtgcaactgcctacatgaagtcggaatc<br/> gtagtaatcgcgatcagcatgccggtgaatacgttccgggccttgtaacaccccccgtcacaccat<br/> gagagttgttaacacccaaagtcggtggggtaaccttttaggaaccagccgctaaggtgggacagatgatt<br/> agggtgaagtcgtaacaaggtagccgtaggagaa</p> |
| <b>3</b> | <p><b><i>Lactiplantibacillus plantarum</i> PLA</b></p> <p>ggtaacggctcaccatggcaatgatacgtagccgacctgagagggtaatcgccacattgggactgagacac</p>                                                                                                                                                                                                                                                                                                                                                                                                                                                                                                                                                                                                                                                                                                                                                                                                                                                                                                                                                                                                                                                                                                                                                                                                                                                                                                                                                                                                                                                                                                                                                                                                                      |

**Table S1.** Genotyping Characterization. 16S rDNA sequences of the isolated lactobacilli strains

|          |                                                                                                                                                                                                                                                                                                                                                                                                                                                                                                                                                                                                                                                                                                                                                                                                                                                                                                                                                                                                                                                                                                                                                                                                                                                                                                                                                                                                                                                                                                                                                                                                                                                                                                                                          |
|----------|------------------------------------------------------------------------------------------------------------------------------------------------------------------------------------------------------------------------------------------------------------------------------------------------------------------------------------------------------------------------------------------------------------------------------------------------------------------------------------------------------------------------------------------------------------------------------------------------------------------------------------------------------------------------------------------------------------------------------------------------------------------------------------------------------------------------------------------------------------------------------------------------------------------------------------------------------------------------------------------------------------------------------------------------------------------------------------------------------------------------------------------------------------------------------------------------------------------------------------------------------------------------------------------------------------------------------------------------------------------------------------------------------------------------------------------------------------------------------------------------------------------------------------------------------------------------------------------------------------------------------------------------------------------------------------------------------------------------------------------|
|          | <p>ggcccaaactcctacgggaggcagcagtagggaatcttccacaatggacgaaagtctgatggagcaacgccg<br/> cgtgagtgaagaagggttcggctcgtaaaactctgtgttaaagaagaacatatctgagagtaactgttca<br/> ggtattgacggtatttaaccagaaagccacggctaactacgtgccagcagccggttaatacgtaggtggca<br/> agcgttgccggatttattgggctgaaagcgagcgagcggttttttaagtctgatgtgaaagccttcggc<br/> tcaaccgaagaagtgcacggaactgggaaacttgagtgcagaagaggacagtggaaactccatgtgtagcg<br/> gtgaaatgcgtagatatatggaagaacaccagtggcgaaggcggtgtctggtctgtaactgacgtgaggc<br/> tcgaaagtatgggtagcaaacaggattagataccctggtagtccataccgtaaacgatgaatgctaagtgtt<br/> ggagggtttccgcccttcagtgtgcagctaacgcattaagcattccgctggggagtacggccgcaaggct<br/> gaaactcaaaggaattgacggggggcccacaaagcggtggagcatgtggtttaattcgaagctacgcgaaga<br/> accttaccaggcttgacatactatgcaaatctaagagattagacgttcccttcggggacatggatacagg<br/> ggtgcatggtgtgctgagctcgtgtcgtgagatgttgggttaagtcgcaacgagcgcaacccttattat<br/> cagttgccagcattaagtgggactctggtgagactgccggtgacaaaccggaggaaggtggggatgacgt<br/> caaatcatcatgccccttatgacctgggctacacacgtgctacaatggatggtacaacgagttgcgaactcg<br/> cgagagtaagctaactcttaagccatttctcagttcggattgtaggctgcaactcgctacatgaagtcgg<br/> aatcgctagtaatcgcggtacgcatgccggtgaatacgttcccgggcctgtacacaccgcccgtcaca<br/> ccatgagagtttgtaacacccaaagtcggtggggttaaccttttaggaaccagccgctaaggtgggacagat<br/> gattagggtgaagtcgtaacaaggtagccgtaggagaa</p>                                                                                                                                                                                                                                                                                                                                                                                                                    |
| <b>4</b> | <p><b><i>Lactocaseibacillus rhamnosus</i> RHM</b></p> <p>aacgctggcggtgcctaatacatgcaagtgcgaacgagttctgattattgaaaggtgcttgcattctgatt<br/> taattttgaacgagtgccggacgggtgagtaacacgtgggtaacctgcccttaagtgggggataacatttg<br/> aaacagatgctaataccgcataaatccaagaaccgcatggttcttggtgaaagatggcgtaagctatcgct<br/> tttgatggaccgcggcggtattagctagttggtgaggtaacggctcaccaaggcaatgatacgtagccgaa<br/> ctgagaggttgatcgccacattgggactgagacacggcccaaactcctacgggaggcagcagtagggaatc<br/> ttccacaatggacgaagtctgatggagcaacgcgcgtgagtgaagaaggcttccgggtcgtaaaactctg<br/> ttgttgagaagaatggtcggcagagtaactgtgtcgcggtgacgggtatccaaccagaaagccacggctaa<br/> ctacgtgccagcagccggttaatacgtaggtggcaagcgttatccggatttattgggcgtaaaagcgagcgc<br/> aggcgggttttttaagtctgatgtgaaagccctcggttaaccgaggaagtgcacggaactgggaaacttg<br/> agtcgagaagaggacagtggaaactccatgtgtagcggtgaaatgcgtagatatatggaagaacaccagtggc<br/> gaaggcggctgtctggtctgtaactgacgtgaggctcgaagcatgggtagcgaacaggattagataccct<br/> ggtagtccatgccgtaaacgatgaatgctaggtgttgagggtttccgcccttcagtgcgcagctaacgca<br/> ttaagcattccgctggggagtacgaccgaaggtgaaactcaaaggaattgacggggggccgcacaagcg<br/> gtggagcatgtggtttaattcgaagcaacgcgaagaaccttaccaggcttgacatctttgatcacctgag<br/> agatcaggtttccccttcgggggcaaaatgacaggtggtgcatggtgtcgtcagctcgtgtcgtgagatgt<br/> tgggttaagtccgcaacgagcgcaacccttatgactagttgccagcatttagttgggactctagtaagac<br/> tgccggtgacaaaccggaggaaggtggggtgacgtcaaatcatcatgccccttatgacctgggctacacac<br/> gtgctacaatggatggtacaacgagttgagacgcgaggtcaagctaactcttaagccatttctcagtt<br/> cggactgtaggtgcaactgcctacacgaagtcggaatcgtagtaatcgcggtacgacgcgcgggtga<br/> atacgttcccgggcctgtacacaccgcccgtcacaccatgagagtttgtaacacccgaagccggtggcgta<br/> accttttagggagcgagccgtctaaggtgggacaaatgattagggtgaagtcgtaacaaggtagccgtagg<br/> agaacc</p> |
