# Supplementary material
Source: MDPI journal article supplement (https://www.mdpi.com/2076-3417/12/10/4989)

**Mediterranea Biotechnologie Srl**

Via Enrico Mattei 85-87  
 86039 Termoli (CB) - Italy  
 Tel. + 39 0875 726048  
 Fax: +39 0875 725 265  
 P.IVA/C.F./R.I. 00837370709  
 REA 82660, Cap. Soc. € 31.200,00 i.v.  
 Cod. SDI: BA6ET11  
[info@mediterranea-srl.it](mailto:info@mediterranea-srl.it)

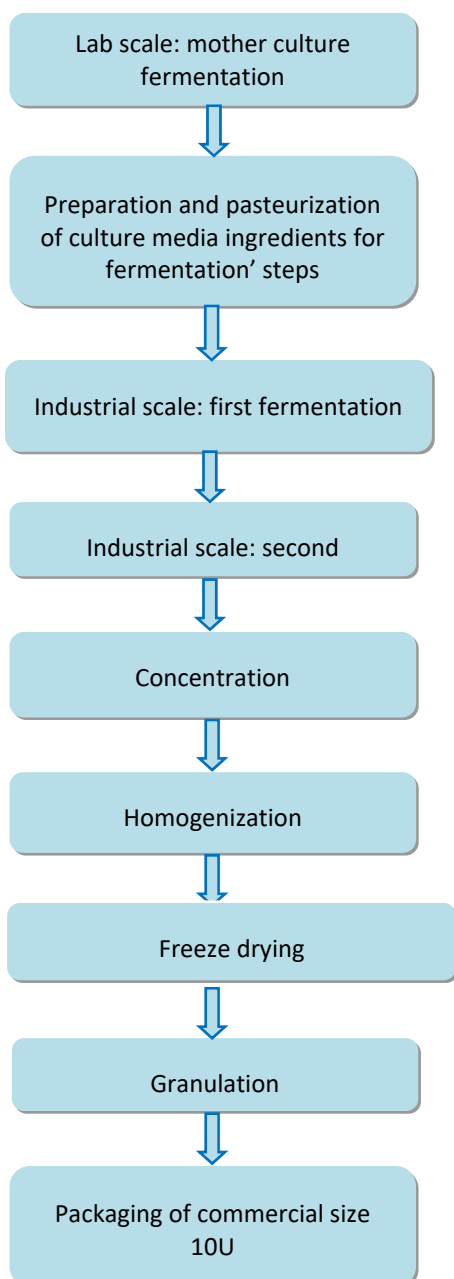

| PLA1<br>(CFU/ML)      | PLA2<br>(CFU/ML)      | PAR4<br>(CFU/ML)      | RHM<br>(CFU/ML)       |
|-----------------------|-----------------------|-----------------------|-----------------------|
| $1.15 \times 10^8$    | $1.35 \times 10^8$    | $1.81 \times 10^8$    | $1.20 \times 10^8$    |
|                       |                       |                       |                       |
| $6.20 \times 10^8$    | $7.00 \times 10^8$    | $5.00 \times 10^8$    | $7.35 \times 10^8$    |
|                       |                       |                       |                       |
| $1.51 \times 10^{10}$ | $1.47 \times 10^{10}$ | $1.75 \times 10^9$    | $6.95 \times 10^9$    |
|                       |                       |                       |                       |
| $3.10 \times 10^{11}$ | $2.47 \times 10^{11}$ | $4.00 \times 10^{10}$ | $7.10 \times 10^{10}$ |
|                       |                       |                       |                       |
| $5.85 \times 10^{11}$ | $5.50 \times 10^{11}$ | $1.25 \times 10^{11}$ | $4.30 \times 10^{11}$ |
|                       |                       |                       |                       |
| sachets n.<br>9.769   | sachets n.<br>6.844   | sachets n.<br>4.018   | sachets n.<br>7.063   |

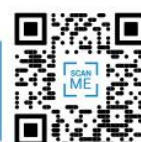

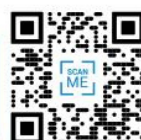

Supplement: s1 [file s1]
